# Supplementary material for: Development of stable Pickering emulsions/oil powders and Pickering HIPEs stabilized by gliadin/chitosan complex particles
Source: Royal Society of Chemistry journal article supplement (doi:10.1039/c7fo00418d), 2017-01-01
Supplement: c7fo00418d1.pdf [file c7fo00418d1.pdf]

**Fig. 1S**

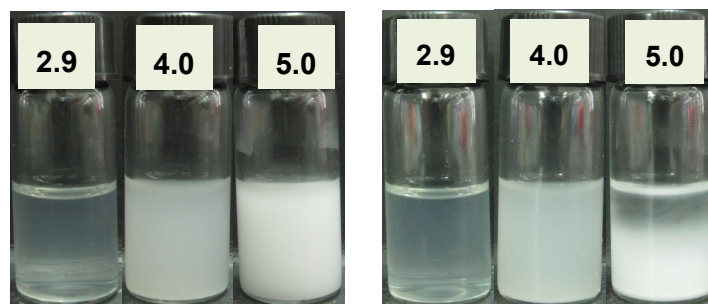

**Fig. 1S** Appearance of the fresh GCHPs dispersions (left) and the GCHPs after 1 day of storage (right) as a function of pH

**Fig. 2S**

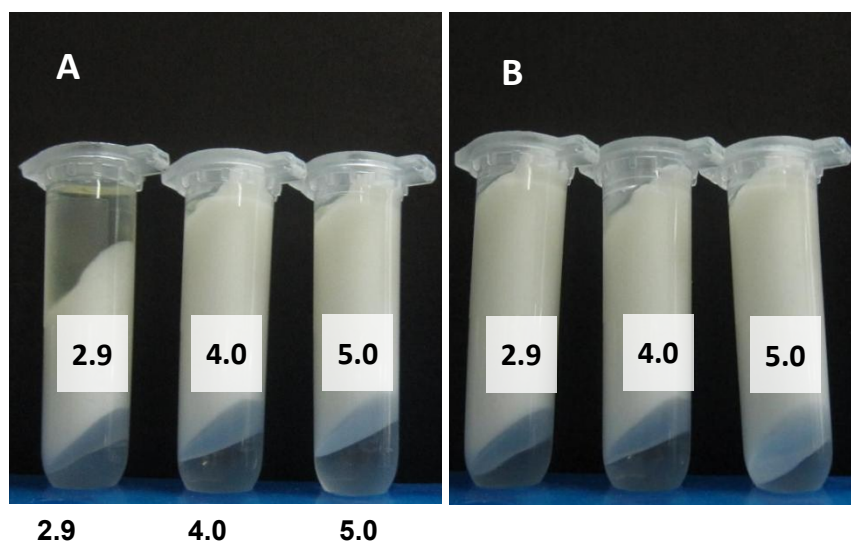

**Fig. 2S** Visual appearance of Pickering high internal phase emulsions (HIPEs) without (A) or with (B) 50 mM NaCl after centrifugation as a function of pH

**Table 1S.** Effect of pH on the particle size and zeta potentials of the gliadin/chitosan hybrid particles in the absence or presence of 50 Mm NaCl

| pH  | NaCl(mM) | Particle size | PDI           | Zeta potentials |
|-----|----------|---------------|---------------|-----------------|
| 2.9 | 0        | 190.3 ± 16.5  | 0.937 ± 0.088 | 52.1 ± 0.9      |
|     | 50       | 225.1 ± 8.6   | 0.229 ± 0.002 | 28.1 ± 0.5      |
| 4   | 0        | 216.6 ± 1.6   | 0.236 ± 0.002 | 30.6 ± 1.9      |
|     | 50       | 276.4 ± 2.8   | 0.161 ± 0.001 | 27.4 ± 0.3      |
| 5   | 0        | 588.8 ± 18.5  | 0.130 ± 0.001 | 19.2 ± 0.2      |
|     | 50       | 531.8 ± 28.2  | 0.139 ± 0.004 | 17.5 ± 1.0      |

**Table 2S.** Effect of salt concentrations on creaming index and particle size of the Pickering emulsions stabilized by the complex particles

| Salt Conc (mM) | CI           | d <sub>4,3</sub> |
|----------------|--------------|------------------|
| 0              | 49.44 ± 0.03 | 20.5 ± 0.05      |
| 10             | 44.99 ± 0.02 | 18.9 ± 0.01      |
| 20             | 29.88 ± 0.02 | 17.7 ± 0.45      |
| 50             | 27.32 ± 0.05 | 29.3 ± 3.85      |
| 100            | 19.05 ± 0.04 | 25.5 ± 0.5       |
| 200            | 9.92 ± 0.05  | 30.3 ± 0.1       |

The emulsions were produced at a fixed oil phase fraction (50%) and by 2% complex particles.

CI: creaming index of the emulsions after 3 days of storage
